# Supplementary material for: Synthesis and characterization of barium silicide (BaSi2) nanowire arrays for potential solar applications
Source: Royal Society of Chemistry journal article supplement (doi:10.1039/c5nr03668b), 2015-01-01
Supplement: c5nr03668b1.pdf [file c5nr03668b1.pdf]

Electronic Supplementary Information

**Synthesis and Characterization of Barium Silicide  
(BaSi<sub>2</sub>) Nanowire Arrays for Potential Solar  
Applications**

*Ankit Pokhrel, Leith Samad, Fei Meng and Song Jin\**

Department of Chemistry, University of Wisconsin - Madison, 1101 University Avenue,  
Madison, Wisconsin 53706, United States

\*E-mail: [jin@chem.wisc.edu](mailto:jin@chem.wisc.edu)

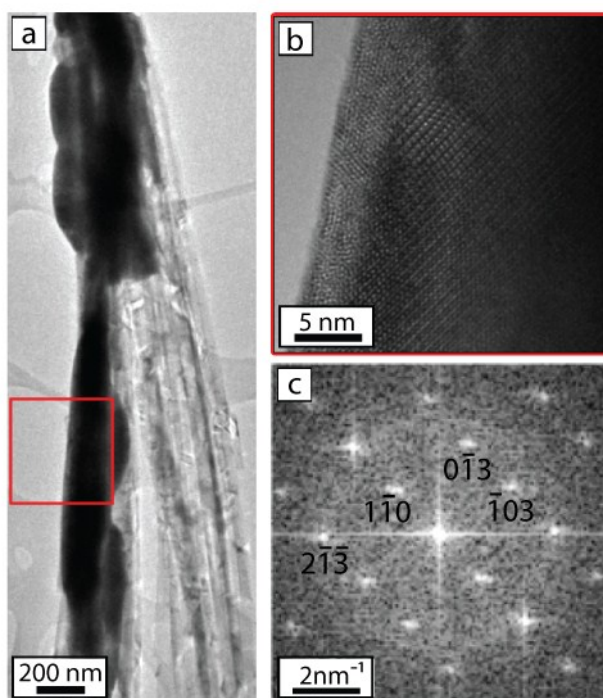

**Fig. S1** TEM micrographs of a representative BaSi<sub>2</sub>/Si NW heterostructure. (a) Low-resolution TEM micrograph of the NW heterostructure clearly showing two distinct phases (Si is atomically

lighter than  $\text{BaSi}_2$  and hence gives the lighter phase contrast among the two materials), (b) lattice-resolved HRTEM micrograph of the selected area in a) along the  $[331]$  zone axis of  $\text{BaSi}_2$  and (c) the corresponding two-dimensional FFT.

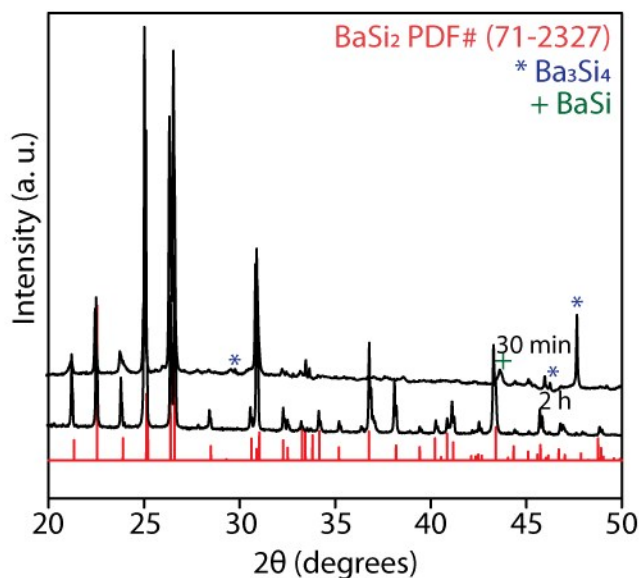

**Fig. S2** PXR D of the as-converted NWs formed at 1000 °C for 30 min and 2 h in comparison with the reference pattern for  $\text{BaSi}_2$  (PDF# 71-2327), demonstrating the presence of minor  $\text{Ba}_3\text{Si}_4$  and  $\text{BaSi}$  phases indicated by \* and +, respectively. These impurities were present only in conversion reactions performed for 30 min.

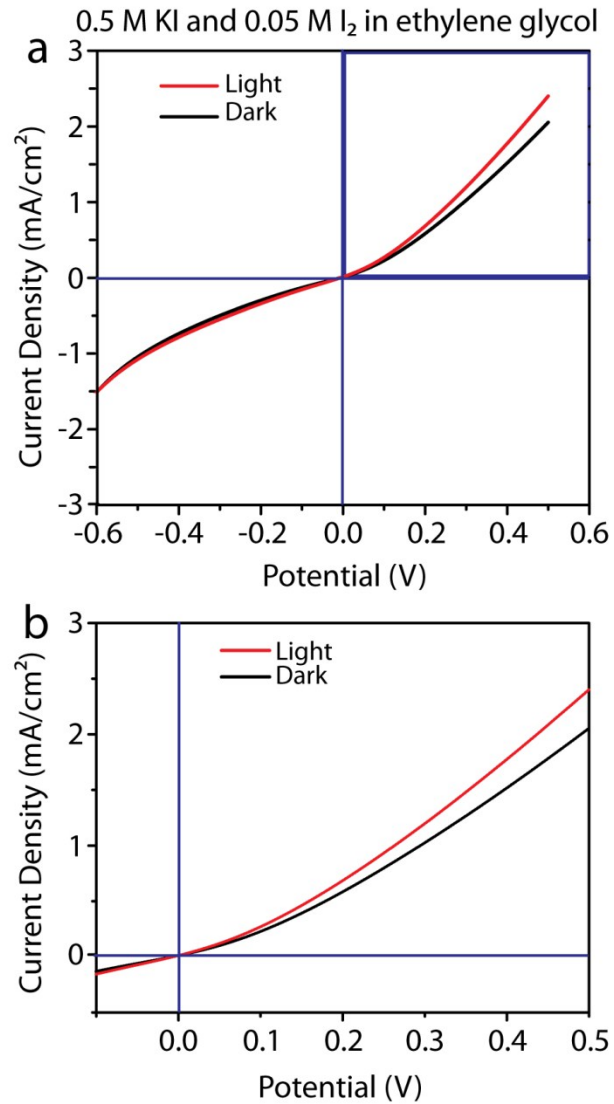

**Fig. S3** The current density–voltage (J-V) curves of the PEC electrode fabricated from BaSi<sub>2</sub> NW arrays in a non-aqueous electrolyte of ethylene glycol and 0.5 M KI/0.05 M I<sub>2</sub> redox couple. (a) J-V curve demonstrating weak diode behavior of the BaSi<sub>2</sub> NW array. (b) Zoomed-in view of the photoactive region demonstrating n-type behavior of the BaSi<sub>2</sub> NW arrays at positive applied voltages.
